# Supplementary material for: Phylogenetic Position and Subspecies Divergence of the Endangered New Zealand Dotterel (Charadrius obscurus)
Source: PubMed Central journal article supplement (PMC3808304; doi:10.1371/journal.pone.0078068), 2013-10-25
Supplement: pone.0078068.s003.pdf [file pone.0078068.s003.pdf]

|                 | <b>BIC *1</b>                                                                           | <b>ratematrix =</b> | <b>statefrequencies =</b> | <b>ratehetmodel =</b> | <b>numratecats =</b> | <b>BIC *2</b> | <b>ratematrix =</b> | <b>statefrequencies =</b> | <b>ratehetmodel =</b> | <b>numratecats =</b> |
|-----------------|-----------------------------------------------------------------------------------------|---------------------|---------------------------|-----------------------|----------------------|---------------|---------------------|---------------------------|-----------------------|----------------------|
| <b>12s</b>      | TIM2+G                                                                                  | (0 1 0 2 1 2)       | estimate                  | gamma                 | 4                    | HKY           | 2rate               | estimate                  | gamma                 | 4                    |
| <b>16s</b>      | TIM2+G                                                                                  | (0 1 0 2 3 2)       | estimate                  | gamma                 | 4                    | GTR           | 6rate               | estimate                  | gamma                 | 4                    |
| <b>mt_cp1</b>   | TIM2+G                                                                                  | (0 1 0 2 3 2)       | estimate                  | gamma                 | 4                    | GTR           | 6rate               | estimate                  | gamma                 | 4                    |
| <b>mt_cp2</b>   | HKY+G                                                                                   | 2rate               | estimate                  | gamma                 | 4                    | HKY           | 2rate               | estimate                  | gamma                 | 4                    |
| <b>mt_cp3</b>   | TIM3+G                                                                                  | (0 1 2 0 3 2)       | estimate                  | gamma                 | 4                    | GTR           | 6rate               | estimate                  | gamma                 | 4                    |
| <b>bFI7</b>     | HKY                                                                                     | 2rate               | estimate                  | none                  | 1                    | HKY           | 2rate               | estimate                  | none                  | 1                    |
| <b>RAG1_cp1</b> | HKY                                                                                     | 2rate               | estimate                  | none                  | 1                    | HKY           | 2rate               | estimate                  | none                  | 1                    |
| <b>RAG1_cp2</b> | HKY                                                                                     | 2rate               | estimate                  | none                  | 1                    | HKY           | 2rate               | estimate                  | none                  | 1                    |
| <b>RAG1_cp3</b> | K80+G                                                                                   | 2rate               | equal                     | gamma                 | 4                    | K80           | 2rate               | equal                     | gamma                 | 4                    |
|                 |                                                                                         |                     |                           |                       |                      |               |                     |                           |                       |                      |
|                 | *1 jmodeltest settings for GARLI: 11 substitution schemes +F +G, nCat4, fixed BIONJ-JC  |                     |                           |                       |                      |               |                     |                           |                       |                      |
|                 | *2 jmodeltest settings for MrBayes: 3 substitution schemes +F +G, nCat4, fixed BIONJ-JC |                     |                           |                       |                      |               |                     |                           |                       |                      |
